1 ***Lactobacillus acidophilus* disrupts collaborative multispecies bile acid metabolism**

2  
3 Sydney Dautel<sup>1,2</sup>, Nymul Khan<sup>1</sup>, Kristopher R. Brandvold<sup>1</sup>, Colin J. Brislawn<sup>1</sup>, Janine  
4 Hutchison<sup>3</sup>, Karl K. Weitz<sup>1</sup>, Heino M. Heyman<sup>1</sup>, Hyun-Seob Song<sup>1</sup>, Zehra Esra Ilhan<sup>4</sup>, Eric A.  
5 Hill<sup>1</sup>, Joshua R. Hansen<sup>1</sup>, Xueyun Zheng<sup>1</sup>, Erin S. Baker<sup>1</sup>, John R. Cort<sup>1</sup>, Young-Mo Kim<sup>1</sup>,  
6 Nancy G. Isern<sup>5</sup>, John K. DiBaise<sup>6</sup>, Rosa Krajmalnik-Brown<sup>4</sup>, Janet K. Jansson<sup>1</sup>, Aaron T.  
7 Wright<sup>1,7</sup>, Thomas O. Metz<sup>1</sup>, Hans C. Bernstein<sup>1,7,8\*</sup>

8  
9 **Affiliations:**

10 <sup>1</sup>Biological Sciences Division, Pacific Northwest National Laboratory, Richland, WA, USA;  
11 <sup>2</sup>School of Medicine, University of Washington, Seattle, WA, USA; <sup>3</sup>Chemical and Biological  
12 Signature Science, Pacific Northwest National Laboratory, Richland, WA, USA; <sup>4</sup>Biodesign  
13 Swette Center for Environmental Biotechnology and Biodesign Center for Fundamental and  
14 Applied Microbiomics, Arizona State University, Tempe, AZ, USA; <sup>5</sup>Environmental Molecular  
15 Sciences Laboratory, Pacific Northwest National Laboratory, Richland, WA, USA; <sup>6</sup>Division of  
16 Gastroenterology, Mayo Clinic, Scottsdale, AZ, USA; <sup>7</sup>The Gene and Linda Voiland School of  
17 Chemical Engineering and Bioengineering, Washington State University, Pullman, WA, USA;  
18 <sup>8</sup>Norwegian College of Fishery Science, UiT - The Arctic University of Norway, 9019, Tromsø,  
19 Norway

20  
21 **\*Correspondence:** Hans C. Bernstein, 902 Battelle Boulevard, P.O. Box 999, MSIN J4-18,  
22 Richland WA, 99352; Phone: 509-371-6989, Email: [Hans.Bernstein@pnnl.gov](mailto:Hans.Bernstein@pnnl.gov); Email:  
23 [Hans.C.Bernstein@uit.no](mailto:Hans.C.Bernstein@uit.no)

24  
25 **Keywords:** probiotic, bile acid, microbiome, consortia, multi-omics, chemical probes

26 **ABSTRACT**

27 Bile acids are metabolic links between hosts and their gut microbiomes, yet little is known about  
28 the roles they play in microbe-to-microbe interactions. Here we present a study designed to  
29 investigate the effect that a common probiotic, *Lactobacillus acidophilus*, has on microbial  
30 interactions that lead to formation of secondary bile acids. A model microbial consortium was  
31 built from three human gut isolates, *Clostridium scindens*, *Collinsella aerofaciens*, and *Blautia*  
32 *obeum*, and cultured under different bile acid and probiotic treatments. A multi-omics platform  
33 that included mass spectrometry-based metabolomics and activity-based proteomic probes was  
34 used to produce two major results. The first, was that an uncommon secondary bile acid –  
35 ursocholate – was produced by a multi-species chemical synthesis pathway. This result  
36 highlights a new microbe-to-microbe interaction mediated by bile acids. The second finding was  
37 that the probiotic strain, *L. acidophilus*, quenched the observed interactions and effectively  
38 halted consortial synthesis of ursocholate. Little is known about the role that ursocholate plays in  
39 human health and development. However, we did discover that a decrease in ursocholate  
40 abundance corresponded with successful weight loss in patients after gastric bypass surgery  
41 versus those who did not lose weight after surgery. Hence, this study uncovered basic knowledge  
42 that may aid future designs of custom probiotic therapies to combat obesity.

43

44

## 45 **INTRODUCTION**

46 The human gastrointestinal (GI) tract is a complex ecosystem that functions in symbiosis with  
47 oral and intestinal microbiomes<sup>1,2</sup>. It has long been recognized that the composition of the gut  
48 microbiome has a significant effect on host digestion but more recent research has implicated the  
49 microbiome in human health and disease states that include cardiovascular disease risk<sup>3</sup>,  
50 neurological function<sup>4</sup>, and autoimmunity<sup>5</sup>. Rapid gains in knowledge of host-microbiome  
51 associations will undoubtedly lead to new practical applications<sup>6</sup>. Of these, the use of probiotics  
52 to modulate both the function and composition of gut microbiomes is especially promising<sup>7,8</sup>.  
53 Probiotic supplementation likely reduces the risk of developing antibiotic associated diarrhea<sup>9</sup>  
54 and necrotizing enterocolitis in infants<sup>10</sup>. However, the therapeutic opportunities for probiotics  
55 are advancing to more precisely target specific processes carried out by the gut microbiome to  
56 impart health benefits beyond enhanced digestion<sup>11-13</sup>. Probiotic therapies are being explored  
57 relieve symptoms of autism<sup>14</sup>, depression<sup>4</sup>, autoimmune diseases<sup>15,16</sup>, and irritable bowel  
58 syndrome<sup>17</sup> among many other conditions with positive – albeit conflicting – results. The  
59 efficacy of probiotic treatments is variable. Differing results can obviously arise from  
60 inconsistent study design – e.g., probiotic strain, dose – trial size, but they are also indicative of a  
61 large scientific knowledge gap and incomplete understanding of the mechanisms by which  
62 probiotics impact the GI-tract microbial ecosystem.

63 There are many hypotheses about the modes of action by which the gut microbiome and  
64 probiotic microbes impact human health. One proposed model is through modulation of the host  
65 immune system<sup>18</sup>, which has been concluded from studies that showed probiotic treatments  
66 affecting host immune function in humans facing pathogenic challenges<sup>19-21</sup> or with autoimmune  
67 disorder<sup>15,16,22</sup>. Another hypothesis is that probiotics increase microbial competition within the

68 intestinal ecosystem, thereby making it more difficult for pathogenic bacteria to survive<sup>23,24</sup>.  
69 Studies have also speculated that observed therapeutic action from probiotics results from their  
70 effect on the intestinal physiology by modulating endothelial junctions<sup>25</sup> and the mucosal  
71 lining<sup>12,25</sup> through a variety of proposed metabolic pathways. Another possible mode of action  
72 for probiotics is through bile acids. It has long been known that bile acids are important linkers  
73 between host and gut microbes. Intestinal bacteria produce secondary bile acids by  
74 deconjugation, reduction, oxidation, and epimerization of their host's primary bile acids. Many  
75 probiotics can alter bile acid pools in humans<sup>26,27</sup>.

76         The primary bile acids (cholic acid and chenodeoxycholic acid) are synthesized in human  
77 hepatocytes and conjugated to the amino acids glycine and taurine to increase solubility<sup>27,28</sup>.  
78 They are then released into the duodenum and moved through the small intestine to assist  
79 emulsification of dietary lipophilic substances<sup>29</sup>. Approximately 95% of the bile acids are then  
80 passively reabsorbed in transit through the small intestine, resulting in approximately 5% (400-  
81 800 mg) passed on to the colon<sup>27</sup>. In the colon, these bile acids are rapidly deconjugated by the  
82 microbiome and reduced, oxidized and epimerized to a variety of secondary bile acids<sup>27</sup>. These  
83 secondary bile acids are known to have diverse effects on human health ranging from direct  
84 cytotoxicity<sup>30</sup>, to altered probability of cancer<sup>31</sup>, to hormonal function as cell messengers<sup>29,32-34</sup>.  
85 More recently, this list of known host-related effects has grown to include modulating the  
86 composition and function of the gut microbiome<sup>35,36</sup> – e.g., by disassembling lipid membranes.

87         The intestinal microbiome represents a major modifier of the human bile acid pool. This  
88 is evinced by the fact that bile in the gall bladder is comprised of 70% primary bile acids but  
89 only 4% primary bile acids in the feces<sup>27</sup>. Not only does the microbiome determine bile acid  
90 composition, but bile acids also direct microbial communities<sup>37</sup>. For example, studies have

91 shown that high fat diets and diets high in resistant starch<sup>38</sup> have an effect on both the bile acid  
92 pool<sup>39</sup> and the microbiome<sup>40</sup>. It has also been shown in rats that oral administration of certain  
93 bile acids can shift the microbiome composition<sup>35,41</sup>. Collectively, these studies suggest that there  
94 is a complex interplay between microbial species and bile acids that is not fully understood.

95         The relationships between the gut microbiome, probiotics and the bile acid pool are  
96 particularly relevant due to the current epidemic of obesity and the comorbidities associated with  
97 high adiposity (high cholesterol, high blood pressure, diabetes)<sup>42</sup>. Due to high rates of obesity,  
98 bariatric surgery has become a more common procedure with the number and types of surgeries  
99 increasing with time<sup>43,44</sup>. It is now well established that bariatric surgery results in reduced  
100 weight and a reduction in many comorbidities of obesity<sup>45</sup>. Several different advantages (weight  
101 loss, reduction of comorbidity) and disadvantages (surgical complications, malnutrition, weight  
102 regain, re-surgery, infection, etc.)<sup>45,46</sup> have been have been identified for different bariatric  
103 procedures. Yet, there remains an incomplete understanding of the exact mechanisms of many of  
104 these outcomes, making it difficult to predict which patients will benefit most from these  
105 procedures. Elucidation of the root causes will require consideration of the impacts that the bile  
106 acid pool, microbiome composition and probiotic administration can have<sup>47,48</sup>. Deeper  
107 mechanistic insight could not only result in increased surgery success, potentially by pre-emptive  
108 modulation of the microbiome by bile acid pool<sup>49,50</sup>, but could also result in less surgeries  
109 necessitated if some of the positive results can indeed be realized via targeted use of probiotics.

110         Here we present a study that was designed to investigate the community dynamics of  
111 microbes commonly found in the gut and the impact that both the addition of bile acids and a  
112 probiotic has on interspecies interactions. An *in vitro* model was built as a three-species bacterial  
113 consortium, *Clostridium scindens*, *Collinsella aerofaciens*, and *Blautia obeum*, each of which

114 occurs naturally in the human gut. This consortium was then treated with the probiotic strain  
115 *Lactobacillus acidophilus* to make an altered four-member consortium. Multi-omics assays were  
116 used to elucidate the interspecies microbial interactions with and without bile acid treatments  
117 (cholic acid and deoxycholic acid). We found that a secondary bile acid, ursocholic acid (7-  
118 epicholic acid), was produced from cholic acid through a multispecies chemical synthesis route  
119 mediated by an interaction between *B. obeum* and *C. aerofaciens*. This process was quenched by  
120 the addition of *L. acidophilus*, which disrupted the coordination between *B. obeum* and *C.*  
121 *aerofaciens* and shut down ursocholic acid production. These results were then contextualized by  
122 performing targeted metabolite measurements in fecal samples from a human clinical study<sup>44</sup> that  
123 investigated secondary bile acid abundances as outcomes of gastric bypass surgery. The  
124 abundance of ursocholic acid corresponded with successful post-operative weight loss,  
125 highlighting that it may be important to investigate the implications of both patient- and microbe-  
126 derived metabolites to help gain a predictive understanding of a patient's response to bariatric  
127 surgery. New knowledge in this area will yield opportunities to design custom probiotic  
128 therapies. More broadly, this study supports an emerging theme in microbiome sciences that  
129 microbial interactions are context dependent and the presence or absence of select species and/or  
130 metabolites can have a strong effect on the overall function.

131

## 132 **RESULTS**

133 **A model microbial consortium responds to probiotic and bile acid treatments.** We  
134 constructed an *in vitro* microbial consortium from human gut bacterial isolates. A 3-member  
135 consortium (3MC) composed of *Clostridium scindens* ATCC 35704, *Collinsella aerofaciens*  
136 ATCC 25986, and *Blautia obeum* ATCC 29174 was compared to a 4-member consortium (3MC

137 + L) that included an added a probiotic strain, *Lactobacillus acidophilus* ATCC 4356. The  
138 species were chosen for this model based on their capacity to perform one-of-three unique  
139 microbial transformations on human bile acids (Table S1): 7 $\alpha$ -dehydroxylation, hydroxysteroid  
140 dehydrogenation, or bile salt hydrolysis<sup>27,37,51,52</sup>.

141 Anaerobic culturing treatments included supplementation with cholic acid and/or  
142 deoxycholic acid and were compared to axenic controls. We found that each member of the  
143 consortia grew together under anaerobic culturing conditions but that each consortium (3MC  
144 versus 3MC + L) had very different growth and extracellular metabolite profiles (Fig. 1). Despite  
145 the anticipated anti-microbial effect of bile acids<sup>26,53,54</sup>, all cultures in media containing added  
146 cholic acid and deoxycholic acid (0.1 mM) showed faster specific growth rates compared to their  
147 corresponding treatments without bile acids (Fig. 1a and b). The axenic controls confirmed that  
148 *L. acidophilus* had the fastest specific growth rate, followed by *B. obeum*, *C. aerofaciens* and *C.*  
149 *scindens*. The probiotic, *L. acidophilus*, was the least affected by the addition of the bile acids to  
150 the growth media, with only a 17% increase in the specific growth rate as compared to 170%,  
151 76% and 167% increases for *C. scindens*, *C. aerofaciens* and *B. obeum*, respectively. An adonis  
152 test was used to show that the species composition of each consortium – i.e., presence/absence of  
153 *L. acidophilus* – was the strongest determiner of variance ( $R^2 = 0.49$ ,  $p < 0.001$ ) in the  
154 extracellular metabolome. This was in contrast to the effect of treatments that tested for changes  
155 in the global metabolome based on bile acid or no bile acid inputs, which were not a statistically  
156 significant source of variance (Fig. 1C). Hence, the probiotic *L. acidophilus* was a major  
157 modifier of the extracellular chemical environment.

158

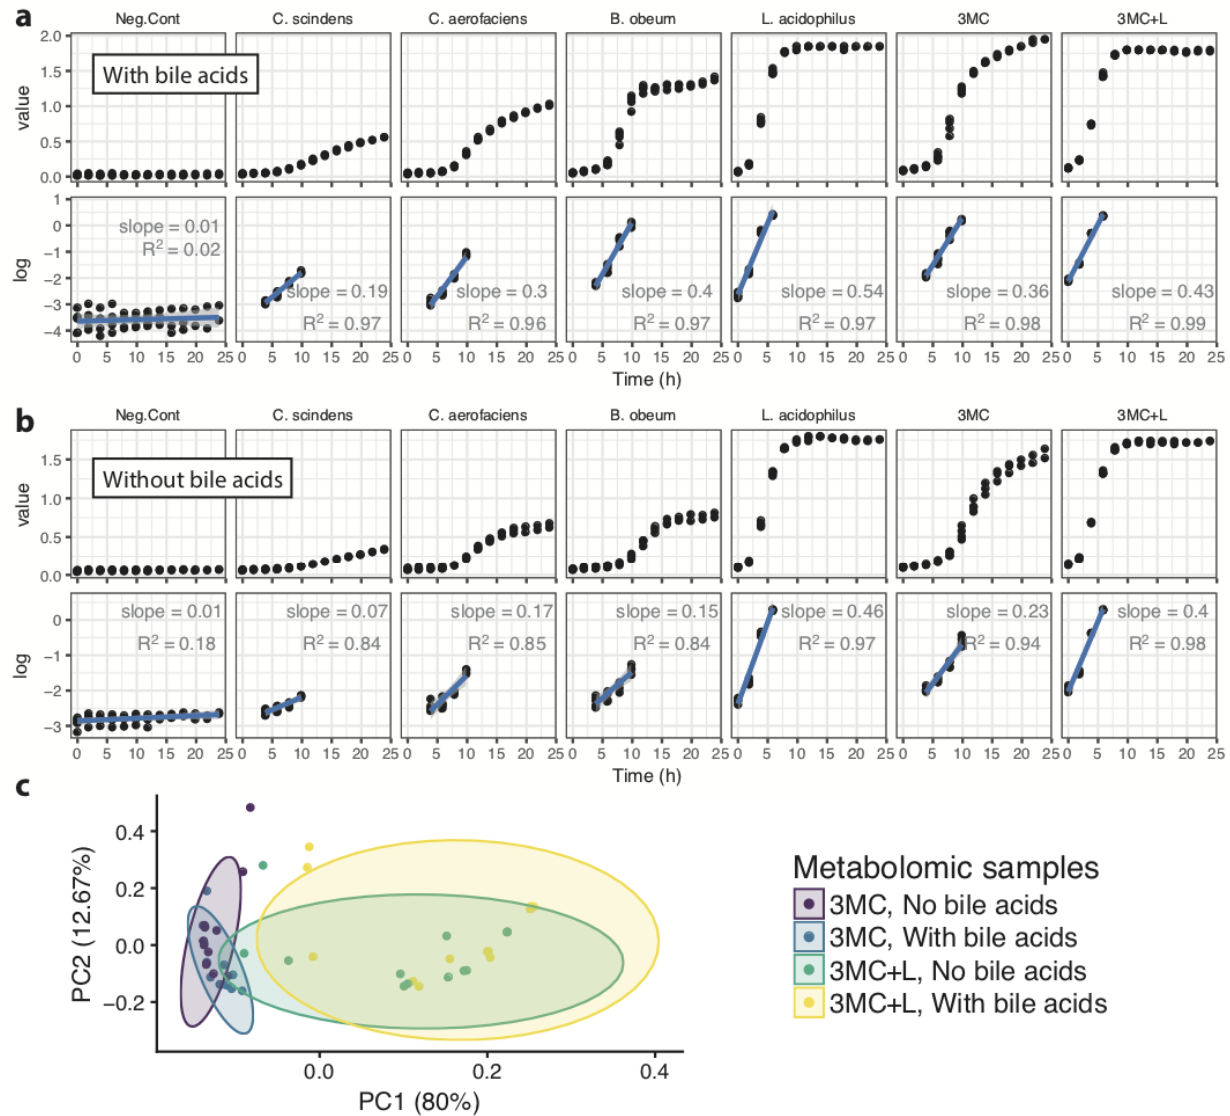

159

160 **Figure 1. Probiotic influence on consortial growth and the extracellular chemical environment.** (A) Growth of the 3-  
 161 member consortium (3MC) in bile acid supplemented media as compared to (B) the 4-member consortium (3MC + L) that  
 162 differed by the addition of probiotic, *L. acidophilus*. The y-axis of A and B represent means from triplicate measurements of  
 163 absolute species abundance defined as the total optical density (OD<sub>630nm</sub>) at each time point multiplied by each respective  
 164 measurement of relative abundance obtained from qPCR; error bars represent ± 1 standard deviation. (C) A principle component  
 165 analysis on the extracellular metabolome ordinated by the Euclidean distance between the metabolic profiles from each  
 166 treatment. The colored ellipses represent 95% confidence limits assuming a multi-variate t-distribution.

167

168 ***L. acidophilus* quenches secondary bile acid production.** Ursocholic acid was produced in the  
 169 3MC (Fig. 2A), but not by any one species grown under axenic conditions. Hence, ursocholic  
 170 acid was produced by a multispecies synthesis route that required at least two species from our  
 171 model consortium. Addition of the probiotic, *L. acidophilus* quenched the production of



172 ursocholic acid to negligible levels as compared to those measured in the 3MC (Fig. 2b). In  
173 addition to ursocholic acid production, *L. acidophilus* also attenuated growth of *B. obeum* and *C.*  
174 *aerofaciens* as observed in the 3MC + L species-specific growth dynamics, which were in stark  
175 contrast to the 3MC (Fig.2c). Within the 3MC + L, *L. acidophilus* became a dominant member  
176 of the community, but in the absence of the probiotic, the 3MC was dominated by *B. obeum* with  
177 *C. scindens* showing the lowest relative abundance in both consortia.

178         The dynamic profiles of bile acids and bacterial species were correlated for each  
179 treatment group, 3MC and 3MC + L (Fig. 2d), respectively. Pearson's correlations were  
180 determined between species and for species to bile acids but not between bile acids. The results  
181 show that ursocholic acid shared strong positive correlations (Pearson's coefficient;  $r > 0.85$ )  
182 with the abundances of *C. aerofaciens* and *B. obeum* in the 3MC. As expected, cholic acid  
183 showed strong negative correlations with *C. aerofaciens* and *B. obeum* within the 3MC,  
184 establishing that it was the most likely substrate for ursocholic acid synthesis. Cholic acid, was  
185 not correlated with *C. scindens*, implying that this species may not have been involved in  
186 production of secondary bile acids directly from cholic acid. The lack of *C. scindens*'  
187 participation in secondary bile acid synthesis in the 3MC was also evinced by its strong negative  
188 correlation with deoxycholic acid, a known  $7\alpha$ -dehydroxylation product of *C. scindens* that  
189 utilizes cholic acid as the substrate<sup>27</sup>.

190 *L. acidophilus* membership  
 191 changed the correlations between species  
 192 and bile acids. Most notably, ursolic  
 193 acid was not correlated with any species  
 194 in the 3MC + L under the probiotic  
 195 treatment. *L. acidophilus* did not  
 196 correlate with any of the bile acids and  
 197 shared strong negative correlations with  
 198 *C. aerofaciens* and *B. obeum*, indicating  
 199 that competition and/or antagonism are  
 200 the likely mechanisms by which the  
 201 multi-species ursolic acid synthesis  
 202 was quenched.

204 **Multispecies synthesis of ursolic**  
 205 **acid.** Based on the metabolomics results,  
 206 we hypothesized a multi-species  
 207 cooperative synthesis of ursolic acid  
 208 that involved both *B.*

209 *obeum* and *C.*  
 210 *aerofaciens*. The initial  
 211 inference was derived by  
 212 comparing the metabolite

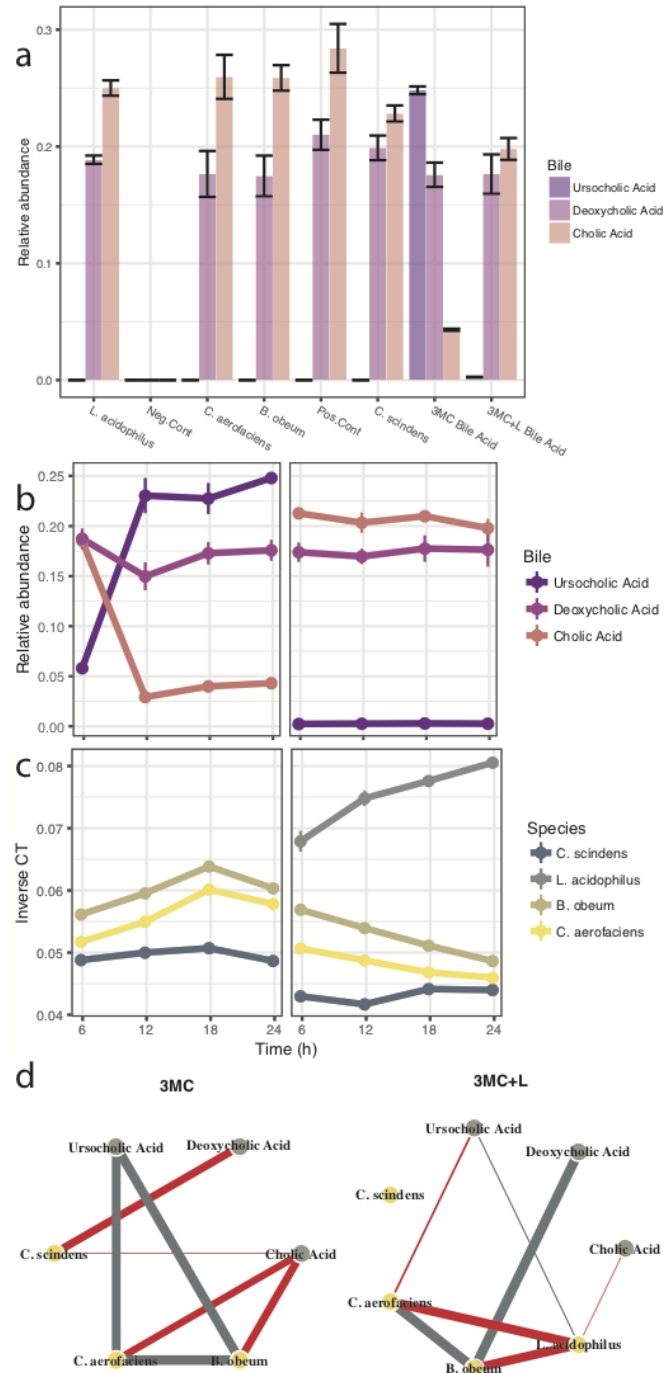

**Figure 2. Secondary bile acid – ursolic acid – was produced by consortia but not axenic cultures; *L. acidophilus* disrupted the consortial synthesis.** (A) Comparative abundances of bile acids measured after 24 h incubations (3MC and 3MC + L) and axenic controls. Time course measurements of (B) bile acid abundances and (C) species abundance as shown by the inverse qPCR cycle thresholds (CT). Comparisons are shown between the 3MC and 3MC + L (with *L. acidophilus*) treated with the 0.1 mM bile acid mixture. Each data point shown in panels A-C represent the mean from a minimum of three biological replicates  $\pm$  1 standard deviation. (D) Pearson's correlations between bacterial species and bile acid abundances; thicker lines correspond to greater correlation coefficients (cut-off below 0.85); red and grey colors correspond to positive and negative correlations, respectively.

213 profiles between the axenic and consortial treatments (Fig. 2a). The next piece of evidence was  
214 obtained from correlations between species and bile acids in the context of *a priori* knowledge of  
215 the metabolic reactions that were the basis for choosing each species in the model consortium  
216 (Fig. 2d). A possible mechanism for this could start with *B. obeum* conversion of cholic acid into  
217 a transient 7-keto intermediate, such as 7-oxodeoxycholic acid. A ketone intermediate was not  
218 identified by our bile-acid-targeting LC-MS metabolomics approach but that does not exclude  
219 the possibility of its existence. The next step could be achieved by the known genome encoded  
220 functions of *C. aerofaciens*, which contains *hdhB* (GenBank accession ZP\_01773061)<sup>55</sup>. This  
221 gene encodes for a 7 $\beta$ -hydroxysteroid dehydrogenase (7 $\beta$ -HSDH), known to catalyze a reaction  
222 that takes a 7-oxodeoxycholic acid to ursocholic acid<sup>56</sup>. However, the *B. obeum* ATCC 29174  
223 genome does not contain an oxidoreductase that is clearly annotated to catalyze our hypothesized  
224 reaction in this first step. *B. obeum* does contain a *baiA* gene (RUMOBE\_03494) that encodes a  
225 putative 7 $\alpha$ -dehydroxylase, but genes encoding for a 7 $\alpha$ -HSDH have yet to be identified. Yet our  
226 experiments clearly showed synthesis of ursocholic acid and we confirmed a required  
227 participation of *B. obeum*; hence, we concluded that a non-specific or previously unidentified  
228 oxidoreductase catalyzed this first step.

229 To test our hypothesis that *B. obeum* expresses enzymes that react with cholic acid (other  
230 than the known BaiA protein), we synthesized and employed a custom cholic acid photo affinity  
231 probe (CAP; cholic acid probe). This probe is a cholic acid derivative designed to bind and  
232 enrich proteins that can then be identified by MS-based proteomics (Fig. 3a). The results were a  
233 suite of proteins from each species in the consortium that were significantly enriched by the CAP  
234 ( $>10^2$  fold-change; p-value  $< 0.001$ ) (Table S2). Surprisingly, the *B. obeum* BaiA protein  
235 (RUMOBE\_03694) was not enriched by the CAP, indicating the possibility of an incorrect

236 annotation from homology of UniProt-KB A5ZWVO or lack of expression in these consortial  
 237 conditions. We identified a suite of *B. obeum* proteins that were significantly enriched by the  
 238 CAP and specific to the treatments corresponding to ursolic acid synthesis and the *B. obeum*  
 239 axenic treatment. Of these, we focused on a pair of oxidoreductases as candidates for the  
 240 hypothesized two-step, two-species reaction that lead to ursolic acid in our consortium. While  
 241 they did not share strong homology with known  $7\alpha$ -HSDH proteins, they were annotated as  
 242 enzymes that may catalyze the hypothesized alcohol-ketone inter-conversions (Fig. 3b). These  
 243 CAP-binding proteins were annotated based on homology as an alcohol dehydrogenase  
 244 (A5ZM66; *RUMOBE\_00083*) and an alcohol-aldehyde dehydrogenase (A5ZNA3;  
 245 *RUMOBE\_00470*).

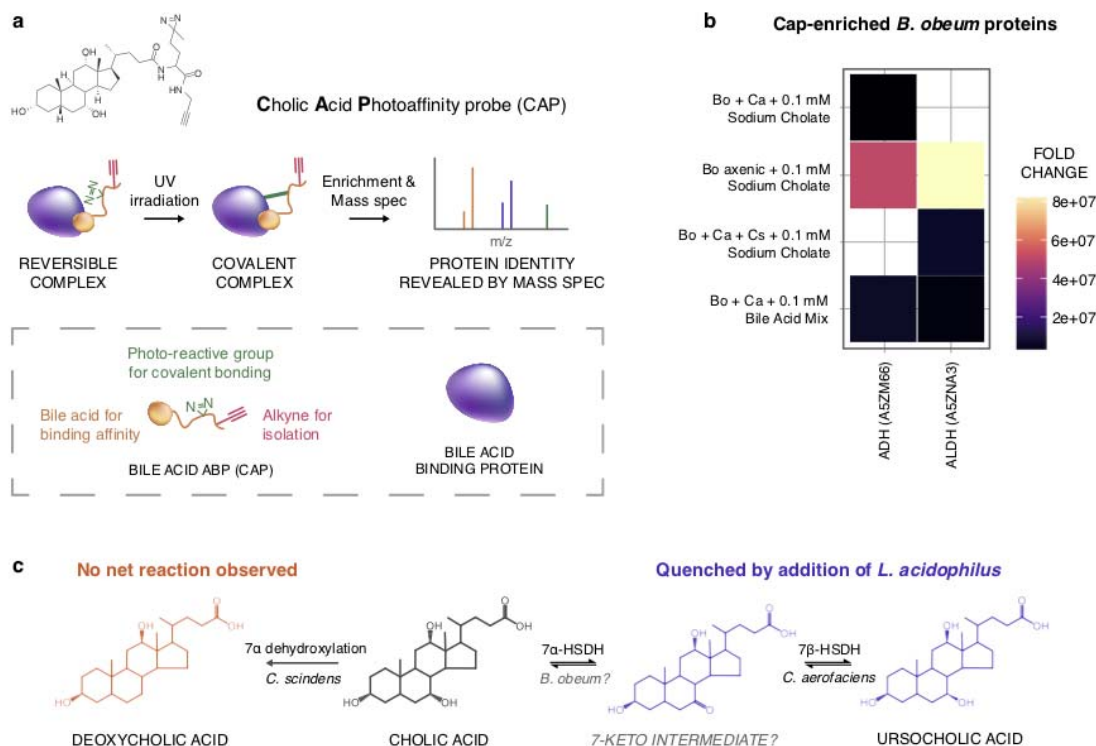

246 **Figure 3. The multispecies synthesis hypothesis and cholic acid binding oxidoreductases.** (A) The cholic acid photoaffinity  
 247 probe (CAP) was synthesized and used to enrich proteins for mass spectrometry-based proteomics. (B) Of the proteins enriched  
 248 by CAP (> 100 fold-change and  $p < 0.001$ ), we identified two oxidoreductases annotated alcohol or alcohol-ketone  
 249 dehydrogenases (ADH and ALDH, respectively). These proteins are *B. obeum* candidates for the hypothesized two-step, two-  
 250 species mechanism (C) leading to the synthesis of ursolic acid. The abbreviations used to describe experimental treatments  
 251 are as follows: Bo (*B. obeum*); Ca (*C. aerofaciens*); and Cs (*C. scindens*).  
 252

253 **Implications toward obesity and**  
254 **bariatric surgery.** The proposed  
255 mechanism for physiological effect for  
256 Roux-en-Y gastric bypass surgery  
257 (RYGB) are BRAVE “Bile flow  
258 alteration, Reduction of gastric size  
259 Anatomical gut re-arrangement, Vagal  
260 manipulation, Enteric gut hormone  
261 modulation<sup>57</sup>. Hence, the GI tract of  
262 patients that have undergone bariatric  
263 surgery is a potential model system to  
264 study bile acid metabolism/alterations

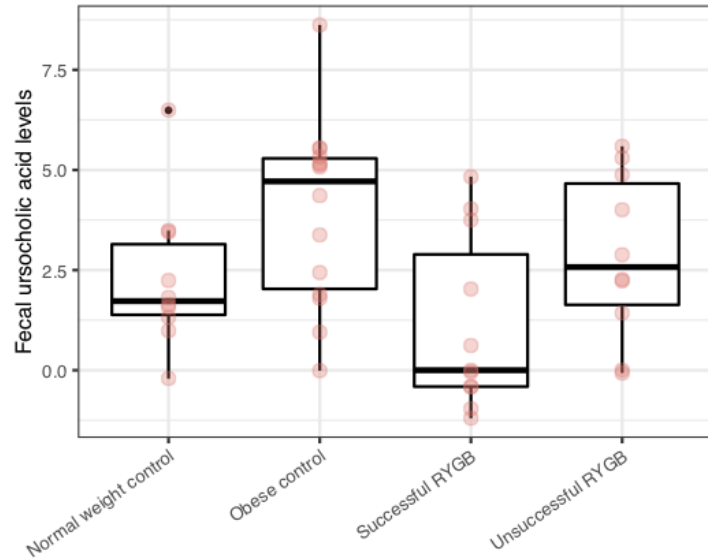

**Figure 4.** Normalized abundance of ursocholic acid in feces of patients who had undergone gastric bypass surgery – Roux-en-Y gastric bypass (RYGB) – as compared to normal weight and obese controls. Unpaired two-tailed t-tests were used to infer a statistical difference between the means of the obese controls – a group that contained pre-operative patients – and those that experience successful RYGB ( $p < 0.005$ ). Different ursocholic acid abundances were also observed – albeit statistically less conclusive – between successful and unsuccessful RYGB patients ( $p < 0.076$ ).

265 given that bile acid profiles change by increasing abundance of secondary bile acids<sup>49</sup>. To  
266 investigate the clinical relevance of ursocholic acid, we leveraged access to a cohort of patients  
267 that had undergone gastric bypass surgery. Targeted measurements of ursocholic acid were  
268 performed and compared in fecal samples collected from 24 patients that underwent RYGB  
269 surgery: 10 patients with normal weight and 14 morbidly obese controls, which included those  
270 scheduled for surgery<sup>44</sup>. We found that the abundance of ursocholic acid corresponded with  
271 obesity and the success of gastric bypass surgical procedures (Fig. 4). Success was defined when  
272 patients exhibited at least 50% excess weight loss and less than 20% regain. Ursocholic acid  
273 levels were significantly higher in the morbidly obese controls (pre-surgery) compared to  
274 patients that had experienced successful gastric bypass surgery. There was no statistically

275 significant difference between the fecal abundance of ursocholic acid in the obese controls and  
276 the unsuccessful surgical patients.

277

## 278 **DISCUSSION**

279 The human gut microbiome is integral to human health and development<sup>58,59</sup>. However, the  
280 function and composition of the human GI-tract ecosystem is complex<sup>60</sup>, which often makes  
281 detailed studies of individual processes difficult. The use of model systems is a valuable  
282 approach to dissect complex biological functions. In particular, simplified model consortia  
283 gaining interest in microbiome research because they enable experimentalists to manage  
284 complexity by controlling multiple system components under defined treatments. The utility of  
285 simplified consortia, or bench-top microbiomes, has been demonstrated for a variety of human-  
286 associated communities<sup>61,62</sup> and other complex microbial ecosystems related to plants<sup>63</sup>,  
287 sediment/biofilms<sup>64-66</sup> and marine habitats<sup>67,68</sup>. Here, we developed a simple model microbial  
288 consortium that was specifically designed to investigate how the addition of a common probiotic  
289 (*L. acidophilus*) effects microbial interactions mediated through bile acid transformations. This  
290 study was not designed to directly inform microbial physiologies that should occur in the human  
291 GI-tract *in situ*. Rather, it was designed and successfully implemented for controlling the  
292 membership of microbial species and presence/absence of bile acids that are associated with  
293 human digestive systems. Our model bile acid consortium helped produce two major results. The  
294 first was that ursocholic acid was synthesized by the coordinated metabolism of a consortium  
295 and not by any single species included within this study. The second important finding was that  
296 probiotic, *L. acidophilus* quenched the observed multi-species interactions that resulted in  
297 secondary bile acid synthesis.

298           Ursocholic acid is the 7 beta-hydroxyepimer of cholic acid. It is rarely mentioned in the  
299 scientific literature and has been termed an “unusual secondary bile acid” as compared to more  
300 commonly studied metabolites such as deoxycholic and ursodeoxycholic acid<sup>69</sup>. Previous studies  
301 have investigated ursocholic acid as a potential therapeutic to modulate the host’s synthesis of  
302 primary bile acids<sup>70</sup>, or to improve the liver function of patients with primary biliary cirrhosis<sup>71</sup>  
303 and reduction of bile cholesterol saturation<sup>72</sup>. In these previous studies, ursocholic acid was  
304 typically tested along with ursodeoxycholic acid and found to be notably less effective as a  
305 treatment for biliary cirrhosis<sup>71</sup>. Despite these therapeutic studies, little is known about the role  
306 that ursocholic acid plays in modulating human-microbe and/or microbe-microbe interactions.

307           The data derived from our clinical study showed that ursocholic acid is in fact present  
308 and abundant within the human GI-tract and its relative abundances change when drastic changes  
309 to microbiome occur (pre- and post- bariatric surgery)<sup>44</sup>. Our limited understanding of the role  
310 that ursocholic acid plays in human health and specifically the host-microbiome interactions that  
311 lead to its production represent a major knowledge gap. This is punctuated by the fact that our  
312 current study – and a previous study<sup>73</sup> – have observed microbial synthesis of ursocholic acid  
313 and/or 7-oxodeoxycholic acid but not conclusively identified the genes and 7 $\alpha$ -HSDH proteins  
314 responsible.

315           Cataloguing the bacterial genes from the “sterolbiome” is an active area of research<sup>74</sup> that  
316 can yield new biological insight and help to improve human health by understanding how  
317 microbes modify chemical environments within the human GI tract. In this study, we  
318 hypothesized a multispecies chemical synthesis route in which *B. obeum* converts cholic acid  
319 into an intermediate ketone via a 7 $\alpha$ -HSDH-like reaction which is then proceeded by the known  
320 7 $\beta$ -HSDH reaction catalyzed by *C. aerofaciens*. Intraspecies 7-epimerization has been



321 demonstrated in *Clostridium limosum*<sup>75</sup> and *Clostridium absonum*<sup>76</sup>, which express both the  
322 required enzymes, 7 $\alpha$ -HSDH and 7 $\beta$ -HSDH. However, genes encoding for 7 $\alpha$ -HSDH, have yet  
323 to be identified in *B. obeum* and other bacteria such as an *Eggerthella* sp. known to express this  
324 protein<sup>73</sup>. Yet, we conclusively found that a collaborative reaction between *B. obeum* and *C.*  
325 *aerofaciens* does occur, which highlights an increase in our understanding of bile acid  
326 metabolism of bacteria.

327         We hypothesized a 7-keto intermediate that was transferred between *B. obeum* and *C.*  
328 *aerofaciens* in the observed multispecies chemical synthesis route. We did not identify an  
329 intermediate such as 7-oxodeoxycholic acid in the supernatant of the samples and therefore  
330 cannot categorically confirm its existence. However, 7 $\alpha$ -HSDH mediated synthesis of 7-  
331 oxodeoxycholic acid has been previously observed in similar multi-step bile acid transformation  
332 processes<sup>56</sup>. It is possible that *C. aerofaciens* has a high affinity uptake mechanism for the  
333 hypothesized 7-keto intermediate such that extracellular concentrations were below the detection  
334 limits of our LC- and GC-MS metabolite identification methods. Another point of uncertainty is  
335 whether the CAP-enriched alcohol dehydrogenase (A5ZM66; *RUMOBE\_00083*) and alcohol-  
336 aldehyde dehydrogenase (A5ZNA3; *RUMOBE\_00470*) were responsible for the hypothesized  
337 reactions. Certainly, other proteins were enriched by CAP (Table S2), yet these were the only *B.*  
338 *obeum* proteins annotated with an enzymatic function capable of alcohol-aldehyde  
339 interconversion. We cannot rule out the possibility that enriched proteins of unknown function  
340 participated in the observed reaction. However, there is some precedent for associating  
341 secondary bile acid synthesis genes with alcohol dehydrogenases. BaiA proteins from *C.*  
342 *scindens*, encoding for 3 $\alpha$ -HSDH proteins, have previously been shown to align well to short  
343 chain alcohol dehydrogenases in *Eubacterium* sp. Strain VPI 12708 and to alcohol/polyol



344 dehydrogenase genes<sup>77,78</sup>. We chose to use *C. scindens* in the 3MC because it has genes that  
345 encode for Bai proteins and express HSDH proteins. In fact, the *C. scindens* reference proteome  
346 (VPI 12708) does contain a putative 7 $\alpha$ -HSDH (UniProtKB – Q03906); however, *C. scindens*  
347 abundances and correlation-based inferences from this study did not provide evidence of *C.*  
348 *scindens*' participation in the transformation of cholic acid to secondary acids. Our conclusion  
349 was that *C. scindens* played a minor role in the system and was largely outcompeted by other  
350 members.

351

352 **Towards precision probiotics to complement bariatric surgery outcomes.** The effect of  
353 probiotics on the human gut microbiome and the bile acid pools are particularly relevant due to  
354 the current epidemic of obesity and the comorbidities associated with high adiposity (high  
355 cholesterol, high blood pressure, diabetes)<sup>42</sup>. Hence, bariatric surgery is becoming more common  
356 as a treatment strategy. Yet knowledge gaps still exist with respect to how metabolites and  
357 microbes could play a role in successful outcomes. Here, we show that the abundance of  
358 ursocholic acid corresponds with the efficacy of gastric bypass surgery. This new knowledge  
359 about the role of specific probiotic strains and/or their metabolic products, are therefore leading  
360 towards promising novel treatments for patients undergoing bariatric surgery. It has already been  
361 shown that post-operative administration of *Lactobacillus* sp. improves weight loss and vitamin  
362 B absorption in RYGB patients<sup>48</sup>. It is possible that the cessation of ursocholic acid production or  
363 increased abundances of *Lactobacillus* sp. could result in better control over weight loss. We also  
364 note that there is some precedent derived from mouse models for the idea that probiotics or  
365 introduction of non-adapted microbial taxa can modulate a hosts' microbiome<sup>7</sup> and microbe-  
366 associated bile acid pool<sup>79</sup>.

367

368           **Conclusion.** This current study was a fundamental investigation of microbial interactions  
369 and the role that a probiotic bacterium plays in modulating the synthesis of secondary bile acids.  
370 It was not intended to inform clinical practice. However, the results and conclusions presented  
371 establish an important idea related to broader microbiome sciences; microbial interactions are  
372 context dependent<sup>64,65</sup> and the presence or absence of select species and/or metabolites can have  
373 a strong effect on the overall community-level function.

374

## 375 **METHODS**

376 **Bacterial strains and cultivation.** *Clostridium scindens* ATCC 35704, *Collineslla aerofaciens*  
377 ATCC 25986, *Blautia obeum* ATCC 29174 (formerly *Ruminococcus obeum*) and *Lactobacillus*  
378 *acidophilus* ATCC 4356 were grown under axenic conditions and in consortia on Lactobacilli  
379 MRS Broth (BD Difco, Houston, TX, USA). The primary treatment the addition of bile salts,  
380 equivalent mixtures of cholic and deoxycholic acid (Sigma-Aldrich 48305, St. Louis, MO,  
381 USA), supplemented to 0.1 mM. The secondary treatment was the presence and absence of  
382 probiotic, *Lactobacillus acidophilus* ATCC 4356 rendering either a 3-member (*L. acidophilus*  
383 negative) or 4-member (*L. acidophilus* positive) consortia. Anaerobic growth conditions were  
384 prepared by boiling the media and subsequently sparging with an 80% N<sub>2</sub>, 10% H<sub>2</sub>, 10% CO<sub>2</sub> gas  
385 mixture and transferring to 30 ml sealed Balch tubes under the same gas headspace prior to  
386 autoclaving. Each culture was inoculated to a starting OD<sub>630nm</sub> = 0.077 ± 0.033 by each axenic  
387 cell suspension resulting in 1 serial passage of log phase cells; consortia were inoculated with an  
388 equivalent volume ratio mL. The optical density (OD<sub>630nm</sub>) was measured over a 24 h period

389 using a Spectronic 20D+ spectrophotometer (ThermoSpectronic, Madison, WI, USA); each time  
390 point was sampled in triplicate via destructive sampling.

391

392 **PCR quantification of gene target.** Bacterial DNA was extracted from consortia and axenic  
393 culture using the MoBio (Carlsbad, CA, USA) PowerSoil DNA Isolation Kit following the  
394 manufacturer's protocol. A total volume of 5  $\mu$ L of undiluted consortia DNA or standard curve  
395 DNA was analyzed in triplicate with an Applied Biosystems 7500 fast instrument (Foster City,  
396 CA). Samples were analyzed in triplicate with the primers shown in Table S3 targeting *rpoB*.  
397 PCR reactions were run using the FAST cycling conditions: initial denaturation was done for 20  
398 seconds at 95 °C followed by 40 cycles of denaturation (95 °C for 3 seconds), annealing (60 °C  
399 for 30 seconds). The output from the real-time PCR assays were  $C_T$  values that represent the  
400 PCR cycle at which the amplification crosses a given threshold (0.1). All  $C_T$  values in Table S4;  
401 data are plotted and analyzed as inverse  $C_T$  representing the relevant abundance<sup>66,80</sup> assuming  
402 equal between species in the consortia.

403

404 **Bile acid identification and quantification.** Stock solutions of the cholic and deoxycholic acids  
405 (Steraloids Inc., Newport, RI, USA) were made in methanol (1 mg mL<sup>-1</sup>) and were then pooled  
406 together and diluted in a series in 0.1% formic acid to generate a 7 pt of the calibration curve  
407 (0.0062, 0.025, 0.050, 0.1, 0.5 and 1  $\mu$ g mL<sup>-1</sup>). An internal standard (23-nor-5 $\beta$ -cholanic acid-3 $\alpha$ ,  
408 12 $\alpha$ -diol) was added to the filtered media (0.2  $\mu$ m) collected from each microbial growth sample.  
409 Cold methanol (-20°C) was added at a ratio of 1:4 (filtrate:MeOH). The samples were mixed via  
410 vortexing, chilled at -20°C for 30 minutes and separated via centrifugation (1725 rpm, 10  
411 minutes). The supernatant was removed and dried and then re-suspended in 0.1% formic acid in

412 deionized water solution. These samples were analyzed on a Waters nano-Acquity UPLC system  
413 (Milford, MA, USA) configured for direct 5  $\mu$ L sample injections onto an in-house packed fused  
414 silica column (360  $\mu$ m o.d. x 150 $\mu$ m i.d. x 30 cm long; Polymicro Technologies Inc., Phoenix,  
415 AZ, USA) containing Waters HSS T3 media (1.8  $\mu$ m particle size). A flow of 600 nL min<sup>-1</sup> was  
416 maintained using mobile phases consisting of (A) 0.1% formic acid in water and (B) 0.12 %  
417 formic acid and 5 mM ammonium acetate in methanol with the following gradient profile (min,  
418 %B): 0, 1; 5, 1; 10, 65; 59, 99; 60, 1. Total run time including column re-equilibration was 75  
419 min. Mass spectrometry (MS) analysis was performed using an Agilent model 6490 triple  
420 quadrupole mass spectrometer (Agilent Technologies, Santa Clara, CA, USA) outfitted with a  
421 custom nano-electrospray ionization interface built using 150  $\mu$ m o.d. x 20  $\mu$ m i.d. chemically  
422 etched fused silica<sup>81</sup>. The hexabore ion transfer tube temperature and spray voltage were held at  
423 200°C and -4.0 kV, respectively. Data were acquired in negative ion mode for 75 min from  
424 sample injection using a dwell time of 200  $\mu$ s, fragmentation of 380 volts, and collision energy  
425 of 10 volts. Selected reaction monitoring (SRM) transitions were acquired as shown in  
426 supplementary Table S5. Ursocholic acid was identified as an unknown in the initial LC-MS  
427 trials. After fractionation and purification, we isolated the unknown and verified that it was  
428 ursocholic acid via NMR and ion mobility mass spectrometry analyses. Authentic ursocholic  
429 acid was purchased from Toronto Research Chemicals (N. York, Ontario, Canada).  
430 Comprehensive details of these procedures are provided in the supplementary materials.

431  
432 **Untargeted Metabolomics.** The spent media was dried, chemically derivated and analyzed by  
433 GC-MS as previously reported<sup>82</sup>. GC-MS raw data files collected by GC-MS were processed  
434 using the Metabolite Detector software, version 2.5 beta<sup>83</sup>. Agilent .D files were converted to

435 netCDF format using Agilent Chemstation (Agilent, Santa Clara, CA, USA) and then converted  
436 to binary files using Metabolite Detector. Samples were aligned chromatographically across all  
437 analyses after deconvolution. Metabolites were identified by matching experimental spectra to a  
438 Pacific Northwest National Laboratory (PNNL) augmented version of FiehnLib<sup>84</sup>. This library  
439 has spectra and validated retention indices for over 850 metabolites. In order to minimize errors  
440 in deconvolution and identification, all metabolite identifications were manually validated after  
441 automated data-processing.

442

443 **Bile acid photoaffinity probes and proteomics.** Custom photoaffinity probes were synthesized  
444 as derivatives of cholic and deoxycholic acid for this study as described in detail within the  
445 supplementary materials. Bacterial lysate samples were normalized to 500  $\mu$ L 1.8 mg/mL  
446 proteome in PBS buffer. Cholic acid photoaffinity probe (CAP) or an equal volume of DMSO  
447 control was incubated with proteome for 60 min at 37 °C. Final DMSO concentration was 1%.  
448 Samples were exposed to UV light (wavelength: 365nm; 115V, 15W) using a Fisher UVP95  
449 lamp (Fisher Scientific, Hampton, NH, USA) for 7 minutes on ice. Subsequent to UV irradiation,  
450 the samples were subjected to click chemistry, with final concentrations of reagents being:  
451 biotin-azide (60  $\mu$ M) in DMSO, sodium ascorbate (10 mM), THPTA (4 mM), and CuSO<sub>4</sub> (8  
452 mM). Each reagent was added individually in that sequence, vortexed, centrifuged, and  
453 incubated at room temperature in the dark for 90 min. 800  $\mu$ L of pre-chilled MeOH was then  
454 added to each sample and incubated at -80 °C freezer for 30 min to induce protein precipitation.  
455 Samples were centrifuged at 14,000 x g at 4°C for 5 min. The supernatant was discarded, and the  
456 pellet was allowed to air-dry for 5 min. Samples were reconstituted and sonicated in 520  $\mu$ l SDS  
457 (1.2%) in PBS; followed by incubation at 95 °C for 2 min. Samples were centrifuged at 14,000 x

458 g for 4 min at room temperature. Protein concentrations were determined via BCA assay and  
459 samples were normalized to a volume of 500  $\mu$ L at 1.2 mg/mL. Trypsin digestion was performed  
460 on protein bound to 100  $\mu$ L Streptavidin-agarose beads. Peptides were reconstituted by adding  
461 40  $\mu$ l of 25 mM  $\text{NH}_4\text{HCO}_3$  and heating the samples at 37°C for 5 min. Samples were transferred  
462 to ultracentrifuge tubes and were centrifuged at 100,000 x g to remove debris. 25  $\mu$ L was added  
463 to glass vials for storage at -20 °C until analysis. All proteomics samples prepared for LC-MS  
464 were analyzed using a Velos Orbitrap MS as previously described<sup>85,86</sup>.

465

466 **Clinical data and experimentation.** Fecal samples were collected from patients at the Mayo  
467 Clinic, Scottsdale, AZ, USA. The metabolomics assays were performed at the Pacific Northwest  
468 National Laboratory by the methods described above. The experimental design has been  
469 previously described<sup>44</sup> and was approved by The Institutional Review Boards of Mayo Clinic  
470 and Arizona State University (IRB# 10-008725).

471

472 **Statistics.** Analysis and graphing was performed in R<sup>87</sup> making use of the ‘vegan’<sup>88</sup> and  
473 ‘igraph’<sup>89</sup> packages, along with many packages in the Tidyverse<sup>90</sup>. The adonis test (permutation  
474 MANOVA) was used to partition a matrix of Euclidean distances between global metabolite  
475 samples based on bile acid and probiotic treatments. An unpaired two-tailed Student’s t-test was  
476 used to compare fecal ursocholic acid measurements between treatment groups. Linear models  
477 were fit to the log of the exponential growth phase of microbial consortia, and for each  
478 regression, the goodness of fit and the probability of observing a similar slope if the true slope  
479 coefficient was zero was reported. Global proteomics was used to identify proteins enriched by  
480 the CAP probes, by selecting proteins with a fold-change increase of >100 and a t-test p-value of

481 < 0.001. The methods for all hypothesis testing and descriptive statistical procedures are  
482 included in the R markdown supplied for this study.

483

484 **Data Repositories and Reproducibility.** The raw data sets for this study along with the R  
485 scripts used for analysis and graphing are available from the Open Science Framework (OSF)  
486 under the name “Bile Acids Consortia” at <https://osf.io/5meyd/>. The mass spectrometry  
487 proteomics data have been deposited to ProteomeXchange with the dataset identifier  
488 PXD008617.

489

#### 490 **ACKNOWLEDGMENT**

491 This research was supported by the Microbiomes in Transition (*MinT*) Initiative, a Laboratory  
492 Directed Research and Development (LDRD) Program of Pacific Northwest National Laboratory  
493 (PNNL). Measurements of bile acids in samples from the human clinical trial were supported by  
494 the PNNL LDRD Program via the Signature Discovery Initiative. Research reported in this  
495 publication was supported by the National Institute of Diabetes and Digestive and Kidney  
496 Diseases of the National Institutes of Health under Award Number R01DK090379. The content  
497 is solely the responsibility of the authors and does not necessarily represent the official views of  
498 the National Institutes of Health. Metabolomics measurements and chemical characterization of  
499 ursocholic acid were performed in the Environmental Molecular Sciences Laboratory (user  
500 project 49356), a national scientific user facility sponsored by the Department of Energy Office  
501 of Biological and Environmental Research, located at PNNL. PNNL is operated for the DOE by  
502 Battelle under contract no. DE-AC05-76RLO-1830. Specific acknowledgments are given to  
503 Heather Brewer, Athena Schepmoes, Rose Perry and Erika Zink for their technical contributions.

504

505 **CONFLICT OF INTEREST**

506 The authors have no conflict of interest to declare.

507 **REFERENCES CITED**

- 508 1 Carballa, M., Regueiro, L. & Lema, J. M. Microbial management of anaerobic digestion:  
509 exploiting the microbiome-functionality nexus. *Curr Opin Biotech* **33**, 103-111 (2015).
- 510 2 Simon, G. L. & Gorbach, S. L. The human intestinal microflora. *Digest Dis Sci* **31**, 147-162 (1986).
- 511 3 Brown, J. M. & Hazen, S. L. Microbial modulation of cardiovascular disease. *Nat Rev Microbiol*  
512 (2018).
- 513 4 Foster, J. A. & Neufeld, K.-A. M. Gut-brain axis: how the microbiome influences anxiety and  
514 depression. *Trends Neurosci* **36**, 305-312 (2013).
- 515 5 Bach, J.-F. The hygiene hypothesis in autoimmunity: the role of pathogens and commensals. *Nat*  
516 *Rev Immunol* (2017).
- 517 6 Schmidt, T. S., Raes, J. & Bork, P. The human gut microbiome: from association to modulation.  
518 *Cell* **172**, 1198-1215 (2018).
- 519 7 Martin, F. P. J. *et al.* Probiotic modulation of symbiotic gut microbial-host metabolic interactions  
520 in a humanized microbiome mouse model. *Mol Sys Biol* **4**, 157 (2008).
- 521 8 Kang, D.-W. *et al.* Microbiota Transfer Therapy alters gut ecosystem and improves  
522 gastrointestinal and autism symptoms: an open-label study. *Microbiome* **5**, 10 (2017).
- 523 9 McFarland, L. V. Meta-analysis of probiotics for the prevention of antibiotic associated diarrhea  
524 and the treatment of *Clostridium difficile* disease. *Am J Gastroenterol* **101**, 812-822 (2006).
- 525 10 AlFaleh, K. & Anabrees, J. Probiotics for prevention of necrotizing enterocolitis in preterm  
526 infants. *Evid-Based Child Health: A Cochrane Rev J* **9**, 584-671 (2014).
- 527 11 Baquero, F. & Nombela, C. The microbiome as a human organ. *Clin Microbiol Inf* **18**, 2-4 (2012).
- 528 12 Bron, P. A., van Baarlen, P. & Kleerebezem, M. Emerging molecular insights into the interaction  
529 between probiotics and the host intestinal mucosa. *Nat Rev Microbiol* **10**, 66-78 (2012).
- 530 13 Hooper, L. V., Littman, D. R. & Macpherson, A. J. Interactions between the microbiota and the  
531 immune system. *Science* **336**, 1268-1273 (2012).
- 532 14 Gilbert, J. A., Krajmalnik-Brown, R., Porazinska, D. L., Weiss, S. J. & Knight, R. Toward effective  
533 probiotics for autism and other neurodevelopmental disorders. *Cell* **155**, 1446-1448 (2013).
- 534 15 Pandey, G., Pandey, A. K., Pandey, S. & Pandey, B. Microbiota in Immune Pathogenesis and the  
535 Prospects for Pre and Probiotic Dietetics in Psoriasis. *Biomed Res J*, 220.
- 536 16 Vaghef-Mehrabany, E. *et al.* Probiotic supplementation improves inflammatory status in  
537 patients with rheumatoid arthritis. *Nutrition* **30**, 430-435 (2014).
- 538 17 Zhang, Y. *et al.* Effects of probiotic type, dose and treatment duration on irritable bowel  
539 syndrome diagnosed by Rome III criteria: a meta-analysis. *BMC Gastroenterol* **16**, 62 (2016).
- 540 18 Rooks, M. G. & Garrett, W. S. Gut microbiota, metabolites and host immunity. *Nat Rev Immunol*  
541 **16**, 341-352 (2016).
- 542 19 Bäumler, A. J. & Sperandio, V. Interactions between the microbiota and pathogenic bacteria in  
543 the gut. *Nature* **535**, 85-93 (2016).
- 544 20 Haywood, B. A. *et al.* Probiotic supplementation reduces the duration and incidence of  
545 infections but not severity in elite rugby union players. *J Sci Med Sport* **17**, 356-360 (2014).



- 546 21 King, S., Glanville, J., Sanders, M. E., Fitzgerald, A. & Varley, D. Effectiveness of probiotics on the  
547 duration of illness in healthy children and adults who develop common acute respiratory  
548 infectious conditions: a systematic review and meta-analysis. *Brit J Nutr* **112**, 41-54 (2014).
- 549 22 Lomax, A. & Calder, P. Probiotics, immune function, infection and inflammation: a review of the  
550 evidence from studies conducted in humans. *Curr Pharm Design* **15**, 1428-1518 (2009).
- 551 23 Fooks, L. & Gibson, G. Probiotics as modulators of the gut flora. *Brit J Nutr* **88**, s39-s49 (2002).
- 552 24 Hemarajata, P. & Versalovic, J. Effects of probiotics on gut microbiota: mechanisms of intestinal  
553 immunomodulation and neuromodulation. *Ther Adv Gastroenter*, 1756283X12459294 (2012).
- 554 25 Ohland, C. L. & MacNaughton, W. K. Probiotic bacteria and intestinal epithelial barrier function.  
555 *Am J Physiol-Gastr L* **298**, G807-G819 (2010).
- 556 26 Begley, M., Gahan, C. G. & Hill, C. The interaction between bacteria and bile. *FEMS Microbiol Rev*  
557 **29**, 625-651 (2005).
- 558 27 Ridlon, J. M., Kang, D.-J. & Hylemon, P. B. Bile salt biotransformations by human intestinal  
559 bacteria. *J Lipid Res* **47**, 241-259 (2006).
- 560 28 Monte, M. J., Marin, J., Antelo, A. & Vazquez-Tato, J. Bile acids: chemistry, physiology, and  
561 pathophysiology. *World J Gastroenterol* **15**, 804-816 (2009).
- 562 29 Kuipers, F., Bloks, V. W. & Groen, A. K. Beyond intestinal soap [mdash] bile acids in metabolic  
563 control. *Nat Rev Endocrinol* **10**, 488-498 (2014).
- 564 30 Attili, A., Angelico, M., Cantafora, A., Alvaro, D. & Capocaccia, L. Bile acid-induced liver toxicity:  
565 relation to the hydrophobic-hydrophilic balance of bile acids. *Med Hypotheses* **19**, 57-69 (1986).
- 566 31 Louis, P., Hold, G. L. & Flint, H. J. The gut microbiota, bacterial metabolites and colorectal cancer.  
567 *Nat Rev Microbiol* **12**, 661-672 (2014).
- 568 32 Degirolamo, C., Rainaldi, S., Bovenga, F., Murzilli, S. & Moschetta, A. Microbiota modification  
569 with probiotics induces hepatic bile acid synthesis via downregulation of the Fxr-Fgf15 axis in  
570 mice. *Cell Rep* **7**, 12-18 (2014).
- 571 33 Kawamata, Y. *et al.* AG protein-coupled receptor responsive to bile acids. *J Biol Chem* **278**, 9435-  
572 9440 (2003).
- 573 34 Thomas, C. *et al.* TGR5-mediated bile acid sensing controls glucose homeostasis. *Cell Metabol*  
574 **10**, 167-177 (2009).
- 575 35 Islam, K. S. *et al.* Bile acid is a host factor that regulates the composition of the cecal microbiota  
576 in rats. *Gastroenterol* **141**, 1773-1781 (2011).
- 577 36 Kurdi, P., Kawanishi, K., Mizutani, K. & Yokota, A. Mechanism of growth inhibition by free bile  
578 acids in lactobacilli and bifidobacteria. *J Bacteriol* **188**, 1979-1986 (2006).
- 579 37 Ridlon, J. M., Kang, D. J., Hylemon, P. B. & Bajaj, J. S. Bile acids and the gut microbiome. *Curr*  
580 *Opin Gastroenerol* **30**, 332 (2014).
- 581 38 Maier, T. V. *et al.* Impact of Dietary Resistant Starch on the Human Gut Microbiome,  
582 Metaproteome, and Metabolome. *mBio* **8**, e01343-01317 (2017).
- 583 39 Sagar, N. M., Cree, I. A., Covington, J. A. & Arasaradnam, R. P. The interplay of the gut  
584 microbiome, bile acids, and volatile organic compounds. *Gastroent Res Pract* **2015** (2015).
- 585 40 Daniel, H. *et al.* High-fat diet alters gut microbiota physiology in mice. *ISME J* **8**, 295-308 (2014).
- 586 41 Nie, Y.-f., Hu, J. & Yan, X.-h. Cross-talk between bile acids and intestinal microbiota in host  
587 metabolism and health. *J Zhejiang University* **16**, 436 (2015).
- 588 42 Swinburn, B. A. *et al.* The global obesity pandemic: shaped by global drivers and local  
589 environments. *Lancet* **378**, 804-814 (2011).
- 590 43 Buchwald, H. & Oien, D. M. Metabolic/bariatric surgery worldwide 2008. *Obes Surg* **19**, 1605-  
591 1611 (2009).
- 592 44 Ilhan, Z. E. *et al.* Distinctive microbiomes and metabolites linked with weight loss after gastric  
593 bypass, but not gastric banding. *ISME J* (2017).

- 594 45 Cottam, D. R., Atkinson, J., Anderson, A., Grace, B. & Fisher, B. A case-controlled matched-pair  
595 cohort study of laparoscopic Roux-en-Y gastric bypass and Lap-Band® patients in a single US  
596 center with three-year follow-up. *Obes Surg* **16**, 534-540 (2006).
- 597 46 Buchwald, H. *et al.* Bariatric surgery: a systematic review and meta-analysis. *Jama* **292**, 1724-  
598 1737 (2004).
- 599 47 Sweeney, T. E. & Morton, J. M. The human gut microbiome: a review of the effect of obesity and  
600 surgically induced weight loss. *JAMA Surg* **148**, 563-569 (2013).
- 601 48 Woodard, G. A. *et al.* Probiotics improve outcomes after Roux-en-Y gastric bypass surgery: a  
602 prospective randomized trial. *J Gastrointest Surg* **13**, 1198-1204 (2009).
- 603 49 Albaugh, V. L. *et al.* Early increases in bile acids post Roux-en-Y gastric bypass are driven by  
604 insulin-sensitizing, secondary bile acids. *J Clin Endocrinol Metab* **100**, E1225-E1233 (2015).
- 605 50 Ryan, K. K. *et al.* FXR is a molecular target for the effects of vertical sleeve gastrectomy. *Nature*  
606 **509**, 183 (2014).
- 607 51 Cayuela, C. & Juste, C. Isolates from Normal Human Intestinal Flora but not Lactic Acid Bacteria  
608 Exhibit 7 $\alpha$ -and 7 $\beta$ -Hydroxysteroid Dehydrogenase Activities. *Microb Ecol Health D* **16** (2004).
- 609 52 Hirano, S. & Masuda, N. Characterization of NADP-dependent 7 beta-hydroxysteroid  
610 dehydrogenases from *Peptostreptococcus productus* and *Eubacterium aerofaciens*. *Appl Environ*  
611 *Microbiol* **43**, 1057-1063 (1982).
- 612 53 Floch, M. H., Binder, H. J., Filburn, B. & Gershengoren, W. The effect of bile acids on intestinal  
613 microflora. *The American journal of clinical nutrition* **25**, 1418-1426 (1972).
- 614 54 Binder, H., Filburn, B. & Floch, M. Bile acid inhibition of intestinal anaerobic organisms. *The*  
615 *American journal of clinical nutrition* **28**, 119-125 (1975).
- 616 55 Liu, L., Aigner, A. & Schmid, R. D. Identification, cloning, heterologous expression, and  
617 characterization of a NADPH-dependent 7 $\beta$ -hydroxysteroid dehydrogenase from *Collinsella*  
618 *aerofaciens*. *Appl Microbiol Biotechnol* **90**, 127-135 (2011).
- 619 56 Ferrandj, E. E. *et al.* In search of sustainable chemical processes: cloning, recombinant  
620 expression, and functional characterization of the 7 $\alpha$ -and 7 $\beta$ -hydroxysteroid dehydrogenases  
621 from *Clostridium absonum*. *Appl Environ Microbiol* **95**, 1221-1233 (2012).
- 622 57 Li, J. V. *et al.* Metabolic surgery profoundly influences gut microbial–host metabolic cross-talk.  
623 *Gut* **60**, 1214-1223 (2011).
- 624 58 Yatsunenkov, T. *et al.* Human gut microbiome viewed across age and geography. *Nature* **486**, 222  
625 (2012).
- 626 59 Huttenhower, C. *et al.* Structure, function and diversity of the healthy human microbiome.  
627 *Nature* **486**, 207 (2012).
- 628 60 Lozupone, C. A., Stombaugh, J. I., Gordon, J. I., Jansson, J. K. & Knight, R. Diversity, stability and  
629 resilience of the human gut microbiota. *Nature* **489**, 220 (2012).
- 630 61 James, G. A. *et al.* Microsensor and transcriptomic signatures of oxygen depletion in biofilms  
631 associated with chronic wounds. *Wound Rep Regen* **24**, 373-383 (2016).
- 632 62 Shu, M., Wong, L., Miller, J. & Sissons, C. Development of multi-species consortia biofilms of oral  
633 bacteria as an enamel and root caries model system. *Arch Oral Biol* **45**, 27-40 (2000).
- 634 63 Niu, B., Paulson, J. N., Zheng, X. & Kolter, R. Simplified and representative bacterial community  
635 of maize roots. *Proc Natl Acad Sci* **114**, E2450-E2459 (2017).
- 636 64 Khan, N. *et al.* Phenotypic responses to interspecies competition and commensalism in a  
637 naturally-derived microbial co-culture. *Sci Rep* **8**, 297 (2018).
- 638 65 Bernstein, H. C. *et al.* Indirect interspecies regulation: transcriptional and physiological  
639 responses of a cyanobacterium to heterotrophic partnership. *MSystems* **2**, e00181-00116  
640 (2017).

- 641 66 Cole, J. K. *et al.* Phototrophic biofilm assembly in microbial-mat-derived unicyanobacterial  
642 consortia: model systems for the study of autotroph-heterotroph interactions. *Front Microbiol* **5**,  
643 109 (2014).
- 644 67 Beliaev, A. S. *et al.* Inference of interactions in cyanobacterial–heterotrophic co-cultures via  
645 transcriptome sequencing. *ISME J* **8**, 2243 (2014).
- 646 68 Boetius, A. *et al.* A marine microbial consortium apparently mediating anaerobic oxidation of  
647 methane. *Nature* **407**, 623 (2000).
- 648 69 Nakashima, T. *et al.* A paucity of unusual trihydroxy bile acids in the urine of patients with  
649 severe liver diseases. *Hepatology* **29**, 1518-1522 (1999).
- 650 70 Tint, G. S. *et al.* Metabolism of ursocholic acid in humans: Conversion of ursocholic acid to  
651 deoxycholic acid. *Hepatology* **15**, 645-650 (1992).
- 652 71 Batta, A. K., Salen, G. & Abroon, J. Ursocholic acid, a hydrophilic bile acid, fails to improve liver  
653 function parameters in primary biliary cirrhosis: comparison with ursodeoxycholic acid. *Am J*  
654 *Gastroenterol* **92** (1997).
- 655 72 Loria, P. *et al.* Effect of ursocholic acid on bile lipid secretion and composition. *Gastroenterol* **90**,  
656 865-874 (1986).
- 657 73 Mythen, S. M., Devendran, S., Méndez-García, C., Cann, I. & Ridlon, J. M. Targeted synthesis and  
658 characterization of a gene-cluster encoding NAD (P) H-dependent 3 $\alpha$ -, 3 $\beta$ -, and 12 $\alpha$ -  
659 hydroxysteroid dehydrogenases from Eggerthella CAG: 298, a gut metagenomic sequence. *Appl*  
660 *Environ Microbiol*, AEM. 02475-02417 (2018).
- 661 74 Ridlon, J. M. & Bajaj, J. S. The human gut sterolbiome: bile acid-microbiome endocrine aspects  
662 and therapeutics. *Acta Pharm Sin B* **5**, 99-105 (2015).
- 663 75 Sutherland, J. D. & Macdonald, I. A. The metabolism of primary, 7-oxo, and 7 beta-hydroxy bile  
664 acids by *Clostridium absonum*. *J Lipid Res* **23**, 726-732 (1982).
- 665 76 Macdonald, I. A. & Roach, P. D. Bile salt induction of 7 $\alpha$ - and 7 $\beta$ -hydroxysteroid dehydrogenases  
666 in *Clostridium absonum*. *Biochimica et Biophysica Acta (BBA)-Lipids and Lipid Metabolism* **665**,  
667 262-269 (1981).
- 668 77 Mallonee, D. H., Lijewski, M. A. & Hylemon, P. B. Expression in *Escherichia coli* and  
669 characterization of a bile acid-inducible 3 $\alpha$ -hydroxysteroid dehydrogenase from *Eubacterium* sp.  
670 strain VPI 12708. *Curr Microbiol* **30**, 259-263 (1995).
- 671 78 White, W., Franklund, C., Coleman, J. & Hylemon, P. Evidence for a multigene family involved in  
672 bile acid 7-dehydroxylation in *Eubacterium* sp. strain VPI 12708. *J Bacteriol* **170**, 4555-4561  
673 (1988).
- 674 79 Martin, F. P. J. *et al.* A top-down systems biology view of microbiome-mammalian metabolic  
675 interactions in a mouse model. *Mol Sys Biol* **3**, 112 (2007).
- 676 80 Habibi, A. *et al.* The effects of vitrification on gene expression in mature mouse oocytes by  
677 nested quantitative PCR. *Journal of assisted reproduction and genetics* **27**, 599-604 (2010).
- 678 81 Kelly, R. T. *et al.* Chemically etched open tubular and monolithic emitters for nanoelectrospray  
679 ionization mass spectrometry. *Anal Chem* **78**, 7796-7801 (2006).
- 680 82 Kim, Y.-M. *et al.* Diel metabolomics analysis of a hot spring chlorophototrophic microbial mat  
681 leads to new hypotheses of community member metabolisms. *Front Microbiol* **6**, 209 (2015).
- 682 83 Hiller, K. *et al.* MetaboliteDetector: comprehensive analysis tool for targeted and nontargeted  
683 GC/MS based metabolome analysis. *Anal Chem* **81**, 3429-3439 (2009).
- 684 84 Kind, T. *et al.* FiehnLib: mass spectral and retention index libraries for metabolomics based on  
685 quadrupole and time-of-flight gas chromatography/mass spectrometry. *Anal Chem* **81**, 10038-  
686 10048 (2009).
- 687 85 Bernstein, H. C. *et al.* Multi-omic dynamics associate oxygenic photosynthesis with nitrogenase-  
688 mediated H<sub>2</sub> production in *Cyanothece* sp. ATCC 51142. *Sci Rep* **5** (2015).

689 86 Sadler, N. C. *et al.* Dinitrogenase-Driven Photobiological Hydrogen Production Combats  
690 Oxidative Stress in *Cyanothece* sp. Strain ATCC 51142. *Appl Environ Microbiol* **82**, 7227-7235  
691 (2016).  
692 87 Team, R. C. R: A language and environment for statistical computing. (2013).  
693 88 Oksanen, J. *et al.* The vegan package. *Community ecology package* **10**, 631-637 (2007).  
694 89 Csardi, G. & Nepusz, T. The igraph software package for complex network research. *InterJournal*,  
695 *Complex Systems* **1695**, 1-9 (2006).  
696 90 Wickham, H. Tidyverse: Easily install and load 'tidyverse' packages. *R package version 1* (2017).  
697
